# Supplementary material for: LINC00472 inhibits cell migration by enhancing intercellular adhesion and regulates H3K27ac level via interacting with P300 in renal clear cell carcinoma
Source: PubMed Central journal article supplement (PMC9653443; doi:10.1038/s41420-022-01243-7), 2022-11-12

**Figure 3I**

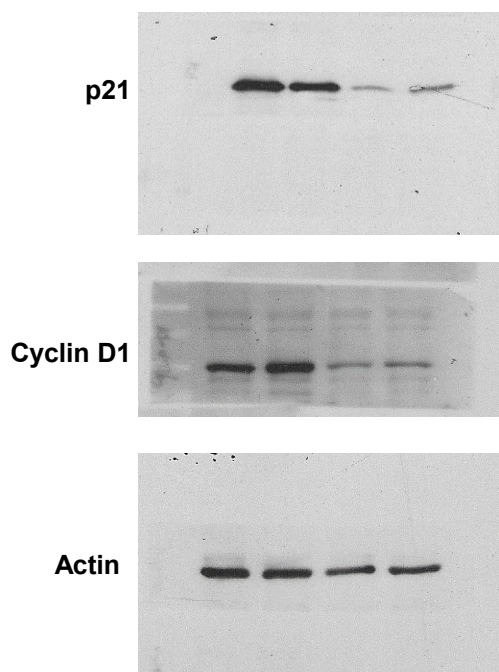

**Figure 5B**

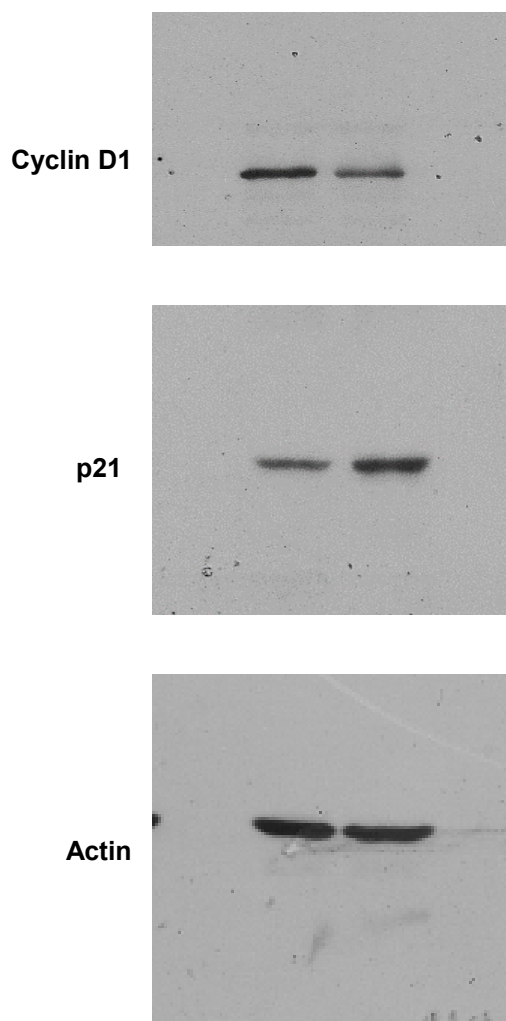

**Figure 5G**

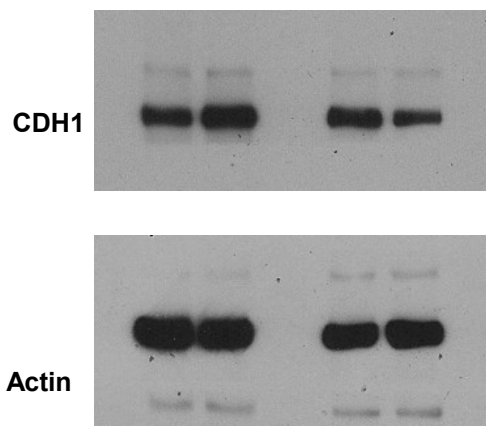

**Figure 7E**

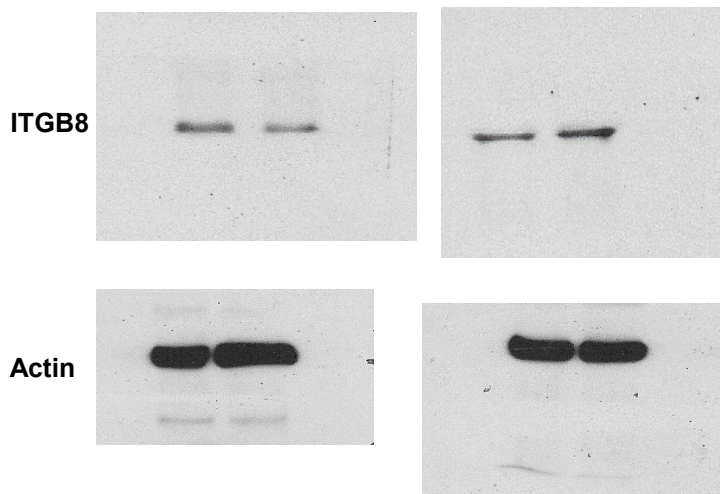

**Figure 8H**

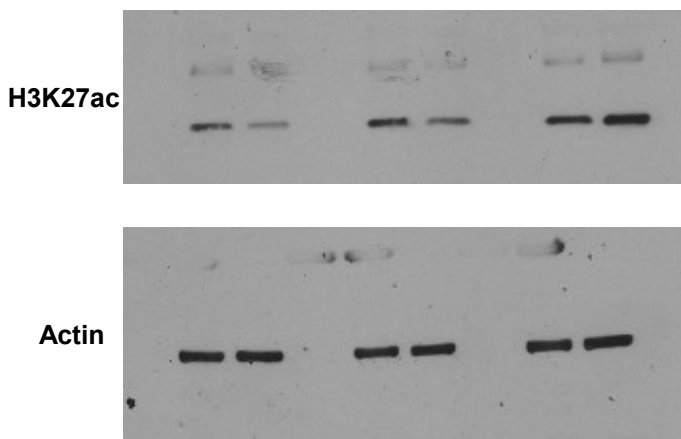

**Figure S4B**

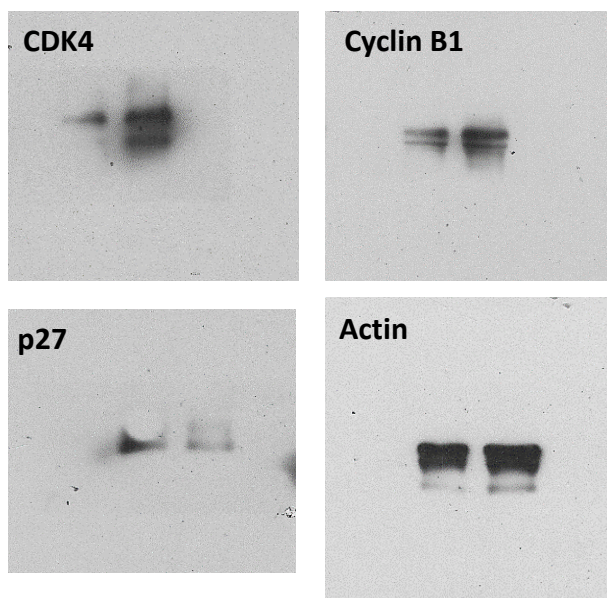

**Figure S5A**

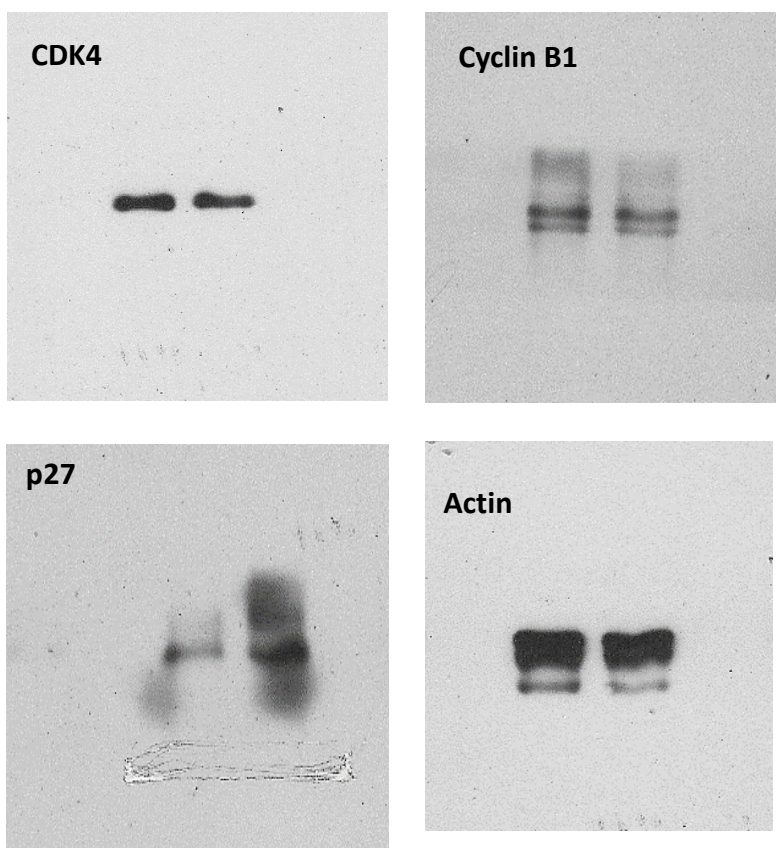

Supplement: 41420_2022_1243_MOESM11_ESM.pdf [file 41420_2022_1243_MOESM11_ESM.pdf]
